# Supplementary material
Source: PubMed Central journal article supplement (PMC2375545)
Supplement: tjp0586-0265-SD1.pdf [file tjp0586-0265-SD1.pdf]

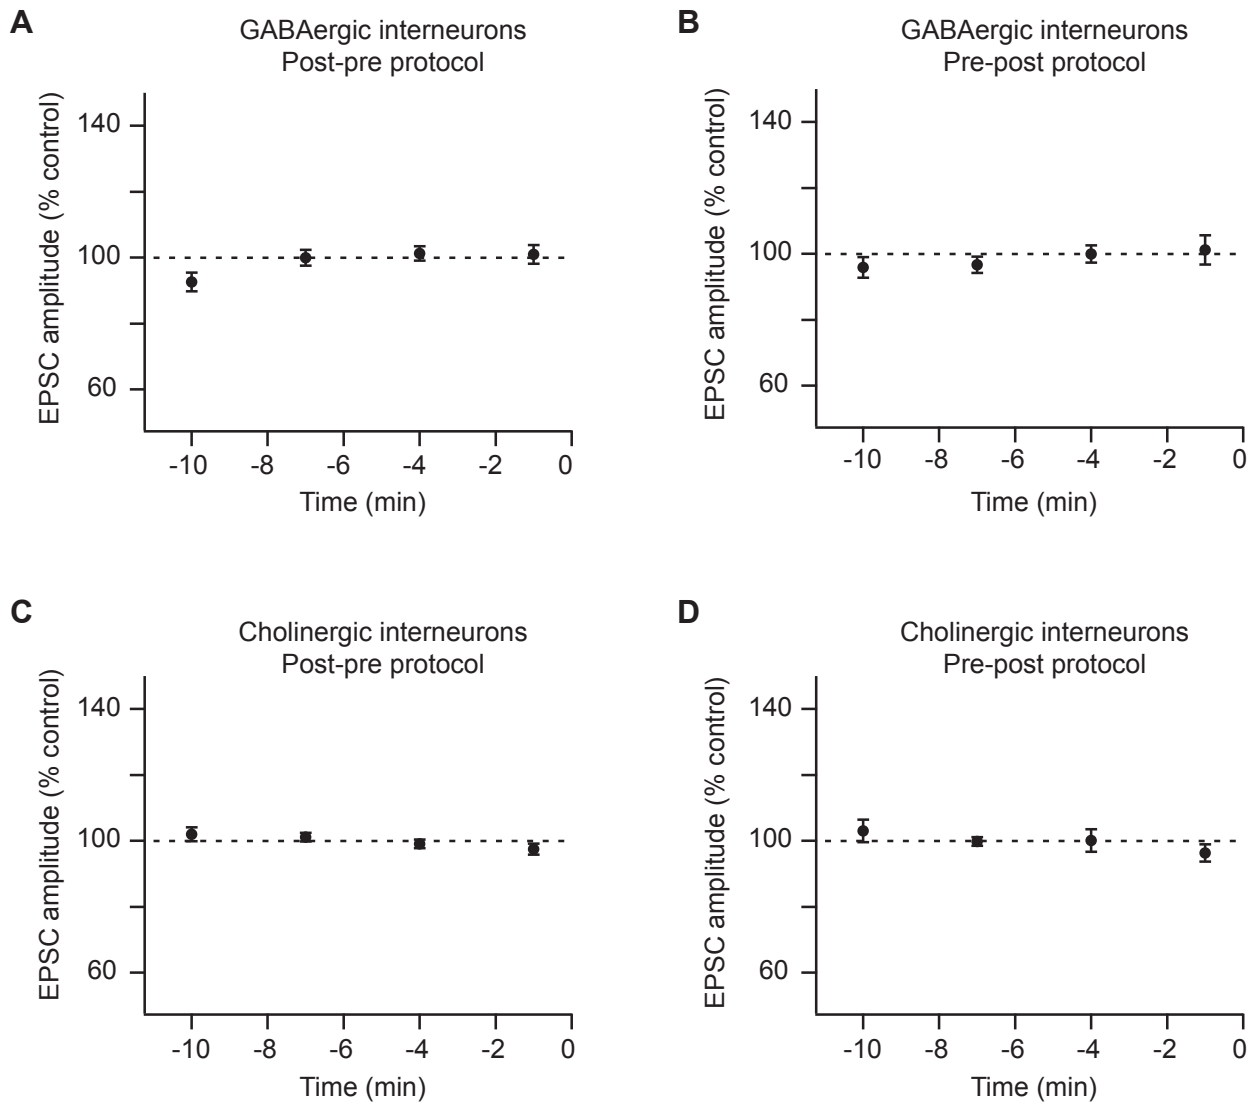

**Supplemental Figure 1:** Averages of normalized EPSC amplitudes recorded in control before STDP protocols for fast-spiking GABAergic interneurons for post-pre protocols (A) (n=10) and pre-post protocols (B) (n=10), and for cholinergic interneurons for post-pre protocols (C) (n=17) and pre-post protocols (D) (n=12). Control EPSC amplitudes were recorded for 10 minutes (minus sign indicates time before the cellular conditioning protocol) and displayed no significant variation.
